# Supplementary material
Source: Copernicus journal article supplement (doi:10.5194/acp-26-5799-2026)
Supplement: Supplementary file 1 [file acp-26-5799-2026-supplement.pdf]

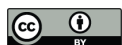

*Supplement of*

**Technical note: Quantifying the nitrogen isotope difference between ammonium in the atmosphere and ammonia emitted from sources**

**Chongguo Tian et al.**

*Correspondence to:* Chongguo Tian (cgtian@yic.ac.cn)

The copyright of individual parts of the supplement might differ from the article licence.

The supplemental material has 11 pages and includes the following items:

**Section S1.** The reason why the reaction between  $\text{NH}_3$  and  $\text{H}_2\text{SO}_4$  proceeds significantly faster than its reactions with  $\text{HNO}_3$  and  $\text{HCl}$  under normal atmospheric conditions.

**Table S1.** Deposition rate constant of  $\text{NH}_3$  ( $D_3$ ) and  $\text{NH}_4^+$  ( $D_4$ ) ( $\text{cm s}^{-1}$ ) assessed by previous studies.

**Table S2.** Generation rate constant of  $\text{NH}_4^+$  ( $G_4$ ,  $\text{h}^{-1}$ ) reported by previous studies.

**Table S3.** Four main types of  $\text{NH}_3$  emission sources in the Yellow River Delta.

**Table S4.** Four main types of  $\text{NH}_3$  emission sources in Changsha.

**Figure S1.** Sensitivity coefficients of the molar fraction of  $\text{NH}_4^+$  to  $\text{NH}_x$  in the atmosphere to the  $\delta^{15}\text{N}_{4a-3s}$  values at  $20^\circ\text{C}$  obtained from six simulation scenarios.

**Figure S2.** The comparison plots of the  $\delta^{15}\text{N}_{4a-3s}$  values calculated by the six fitted equations (FE) against the six model scenarios (MS) simulated by the developed model.

**Figure S3.** Scatter plots of the  $\delta^{15}\text{N}_{4a-3s}$  values calculated by the six fitted equations (FE) against the six model scenarios (MS) simulated by the developed model.

## Section S1

The chemical reaction between ammonia gas and acidic aerosols (sulfuric acid (H<sub>2</sub>SO<sub>4</sub>), nitric acid (HNO<sub>3</sub>) and hydrochloric acid (HCl)) (referred to as the gas-to-particle phase transformation process) has been extensively studied. These gas-to-particle phase transformation processes produce ammonium salts (NH<sub>4</sub><sup>+</sup>), nitrate (NO<sub>3</sub><sup>-</sup>), sulfate (SO<sub>4</sub><sup>2-</sup>), and chloride (Cl<sup>-</sup>), which constitute the main components of secondary PM<sub>2.5</sub> (Sharma et al., 2007). The formation of these salts depends on the concentrations of ammonia gas and acidic precursor gases (nitrogen dioxide (NO<sub>2</sub>) and sulfur dioxide (SO<sub>2</sub>)), temperature, relative humidity, solar radiation, and the mixing height of the boundary layer (Behera and Sharma, 2011). Among these influencing factors, gas phase constituent concentration is an important one. Overall, it can be summarized that under normal atmospheric conditions, the reaction between NH<sub>3</sub> and H<sub>2</sub>SO<sub>4</sub> is preferred over reactions of NH<sub>3</sub> with HNO<sub>3</sub> and NH<sub>3</sub> with HCl. As reported that the reaction rate constants of NH<sub>3</sub> and H<sub>2</sub>SO<sub>4</sub> ( $k_S$ ) showed relatively greater than  $k_N$  (NH<sub>3</sub> with HNO<sub>3</sub>) and  $k_{Cl}$  (NH<sub>3</sub> with HCl). For instance, an environmental chamber study (Behera and Sharma, 2012) showed that the rate constants of  $k_S$ ,  $k_N$ , and  $k_{Cl}$  were estimated as  $2.68 (\pm 1.38) \times 10^{-4} \text{ m}^3/\mu\text{mol/s}$ ,  $1.59 (\pm 0.897) \text{ m}^3/\mu\text{mol/s}$ , and  $5.16 (\pm 3.50) \times 10^{-5} \text{ m}^3/\mu\text{mol/s}$ . A field study (Baek et al., 2004) showed that  $k_S = 1.14 (\pm 1.25) \times 10^{-4} \text{ m}^3/\text{mmol/s}$ ,  $k_N = 0.73 (\pm 1.49) \times 10^{-4} \text{ m}^3/\text{mmol/s}$ , and  $k_{Cl} = 0.86 (\pm 1.44) \times 10^{-4} \text{ m}^3/\text{mmol/s}$ , respectively.

Table S1 lists deposition rate constant of NH<sub>3</sub> (D<sub>3</sub>) and NH<sub>4</sub><sup>+</sup> (D<sub>4</sub>) assessed by previous studies. The average values of the deposition rate constants of D<sub>3</sub> and D<sub>4</sub> reported in the literature were  $1.14 \pm 0.88 \text{ cm s}^{-1}$  and  $0.52 \pm 0.46 \text{ cm s}^{-1}$ , respectively. This indicated that the ratio of NH<sub>3</sub> to NH<sub>4</sub><sup>+</sup> deposition rates was  $0.46 \pm 0.048$ . A model study recommended that the deposition rates of NH<sub>3</sub> and NH<sub>4</sub><sup>+</sup> were 7.4 and 2.4 mm s<sup>-1</sup> (Zhang et al., 2011; Shen et al., 2009). It suggested that the ratio of NH<sub>3</sub> to NH<sub>4</sub><sup>+</sup> deposition rates was 0.32. The average of the two estimates was 0.39. Based on a standard deviation of 0.048, the 95% confidence interval for this ratio was 0.29-0.48. Based on the above statistical analysis, we chose the ratio of D<sub>4</sub> to D<sub>3</sub> to be within the range of 0.2 to 0.5 for further scenario simulation.

As shown in Table S1, the averaged deposition rate constant of NH<sub>3</sub> is  $1.14 \pm 0.88 \text{ cm s}^{-1}$ . Assuming that the deposition heights were 100m and 200m, the deposition rate could be 0.89 h<sup>-1</sup> and 1.59 h<sup>-1</sup>. Table S2 lists the generation rate constant of NH<sub>4</sub><sup>+</sup> (G<sub>4</sub>) reported by previous studies. The average of G<sub>4</sub> was 0.90 h<sup>-1</sup>, which was comparable to D<sub>3</sub> when the deposition height was assumed to be 100 m. These previous studies also found that the formation rate of ammonium salt was closely related to the altitude of the atmosphere. On the basis of the statistical analysis, we chose the ratio of G<sub>4</sub> to D<sub>3</sub> to be within the range of 0.5 to 2.0 for further scenario simulation.

**Table S1. Deposition rate constant of NH<sub>3</sub> (D<sub>3</sub>) and NH<sub>4</sub><sup>+</sup> (D<sub>4</sub>) (cm s<sup>-1</sup>) assessed by previous studies.**

| NH <sub>3</sub> (D <sub>3</sub> ) | Receptor                          | Reference     |
|-----------------------------------|-----------------------------------|---------------|
| 0.3                               | Soil                              | (Krupa, 2003) |
| 0.5                               | Soil, exposure chamber            | (Krupa, 2003) |
| 0.5–0.06                          | Soil, field conditions            | (Krupa, 2003) |
| 1                                 | Soil, maximum                     | (Krupa, 2003) |
| 0.3–1.3                           | Different species, during the day | (Krupa, 2003) |
| 0.03–0.13                         | Different species, at night       | (Krupa, 2003) |

---

|                                       |                                          |                              |
|---------------------------------------|------------------------------------------|------------------------------|
| 0.1–0.4                               | Bogs                                     | (Krupa, 2003)                |
| 0.4                                   | Agricultural                             | (Schrader and Brummer, 2014) |
| 1.9                                   | Heathlands/bogs                          | (Krupa, 2003)                |
| 1.6                                   | Grass ( <i>Lolium multiflorum</i> )      | (Krupa, 2003)                |
| 2.2                                   | Forest                                   | (Krupa, 2003)                |
| 2.7±0.7                               | Douglas fir forest                       | (Krupa, 2003)                |
| 3.2                                   | Douglas fir forest                       | (Krupa, 2003)                |
| 3.6                                   | Coniferous forest                        | (Krupa, 2003)                |
| 0.5–5                                 | Exterior surfaces and interior of leaves | (Krupa, 2003)                |
| 2.1                                   | Coniferous forest                        | (Schrader and Brummer, 2014) |
| 1.2                                   | Mixed forest                             | (Schrader and Brummer, 2014) |
| 0.9                                   | Deciduous forest                         | (Schrader and Brummer, 2014) |
| 1.5                                   | Mixed forest                             | (Schrader and Brummer, 2014) |
| 2.2                                   | Coniferous forest                        | (Schrader and Brummer, 2014) |
| 0.87                                  | Urban                                    | (Schrader and Brummer, 2014) |
| 0.07                                  | In residential areas,                    | (Yang et al., 2010)          |
| 0.74                                  | The North China Plain                    | (Shen et al., 2009)          |
| 0.7                                   | Semi-natural                             | (Schrader and Brummer, 2014) |
| 0.23                                  | In the field                             | (Yang et al., 2010)          |
| 0.626 ± 0.0976                        | Sea                                      | (Zhang et al., 2010)         |
| 0.7                                   | Water                                    | (Schrader and Brummer, 2014) |
| 0.6                                   | Water                                    | (Schrader and Brummer, 2014) |
| 0.81 ± 0.19                           | Northwestern Pacific                     | (Zhang et al., 2003)         |
| 0.8–2.0                               | Atlantic Basin                           | (Renard et al., 2004)        |
| 0.83                                  | Australia-Southern Ocean                 | (Renard et al., 2004)        |
| 0.83                                  | NE Pacific                               | (Renard et al., 2004)        |
| 0.88                                  | North and Baltic Seas                    | (Renard et al., 2004)        |
| 0.76                                  | North Sea                                | (Renard et al., 2004)        |
| 0.7                                   | Tampa Bay                                | (Renard et al., 2004)        |
| 0.2–1.5                               | North Sea                                | (Renard et al., 2004)        |
| 1.14 ± 0.88                           | Mean                                     |                              |
| <br>$\text{NH}_4^+$ (D <sub>4</sub> ) |                                          |                              |
| 1.0                                   | Beech canopy                             | (Krupa, 2003)                |
| 0.0032                                | Bean                                     | (Krupa, 2003)                |
| 0.7–1.3                               | Beech canopy (throughfall)               | (Krupa, 2003)                |
| 0.7–2.1                               | Spruce canopy (throughfall)              | (Krupa, 2003)                |

---

|             |                                             |                      |
|-------------|---------------------------------------------|----------------------|
| 0.5–1.5     | Spruce/beechn forest (throughfall)          | (Krupa, 2003)        |
| 0.44–0.60   | <i>Ceanothus crassifolius</i> leaves/canopy | (Krupa, 2003)        |
| 0.2         | Heathlands/bogs                             | (Krupa, 2003)        |
| 0.28±0.05   | the Yellow Sea coastal region               | (Qi et al., 2013)    |
| 0.21        | over the Yellow Sea                         | (Shi et al., 2013)   |
| 0.1         | Huaniao Island                              | (Zhu et al., 2013)   |
| 0.06 ±0.01  | Northwestern Pacifica                       | (Zhang et al., 2003) |
| 0.52 ± 0.46 | Mean                                        |                      |

**Table S2. Generation rate constant of NH<sub>4</sub><sup>+</sup> (G<sub>4</sub>, h<sup>-1</sup>) reported by previous studies.**

|                                                    | G <sub>4</sub> | Reference                       |
|----------------------------------------------------|----------------|---------------------------------|
| Chamber study                                      | 0.35±0.21      | (Behera and Sharma, 2011)       |
| The Netherlands (< 200 m)                          | 3.6            | (Vemetten et al., 1985)         |
| Daytime from vertical concentration distribution   | 0.36           | (Erismann et al., 1988)         |
| Nighttime from vertical concentration distribution | 0.18           | (Erismann et al., 1988)         |
| A rural site in eastern England                    | 0.014-0.14     | (Harrison and Kitto, 1992)      |
| Horizontal concentration distribution              | 0.01-1.48      | (Harrison and Kitto, 1992)      |
| Low layer atmosphere (< 100 m)                     | 0.04-3.60      | (Baek et al., 2004)             |
| Atmosphere at 400 m heights                        | 0.08           | (Lenhard and Gravenhorst, 1980) |
| Mean                                               | 0.90           |                                 |

**Table S3. Four main types of NH<sub>3</sub> emission sources in the Yellow River Delta.**

| Sources              | Average | SD   | Reference                                                                                                           |
|----------------------|---------|------|---------------------------------------------------------------------------------------------------------------------|
| Livestock waste      | -16.14‰ | 7.98 | (Freyer, 1978; Heaton, 1987; David Felix et al., 2013; Chang et al., 2016; Bhattarai et al., 2020; Ti et al., 2018) |
| Vehicle exhaust      | +6.62‰  | 1.89 | (Walters et al., 2020; Song et al., 2021)                                                                           |
| NH <sub>3</sub> slip | -7.13‰  | 7.62 | (David Felix et al., 2013; Bhattarai et al., 2020; Chang et al., 2022)                                              |
| Fertilizer use       | -25.21‰ | 9.43 | (David Felix et al., 2013) (Chang et al., 2016; Bhattarai et al., 2020; Ti et al., 2018; Ti et al., 2019)           |

**Table S4. Four main types of NH<sub>3</sub> emission sources in Changsha.**

| Sources               | Average | SD  | Reference                                                                                                    |
|-----------------------|---------|-----|--------------------------------------------------------------------------------------------------------------|
| Agriculture emissions | -16.7‰  | 8.6 | (Frank et al., 2004; Freyer, 1978; Heaton, 1987; Hristov et al., 2009; Savard et al., 2017; Ti et al., 2018) |
| Coal combustion       | -8.4‰   | 4.3 | (Bhattarai et al., 2020; Freyer, 1978)                                                                       |
| Vehicle emissions     | 4.7‰    | 5.0 | (Savard et al., 2017; Smirnov et al., 2012; Walters et al., 2020; Song et al., 2021)                         |
| Biomass burning       | -13.0‰  | 8.9 | (Song, 2021)                                                                                                 |

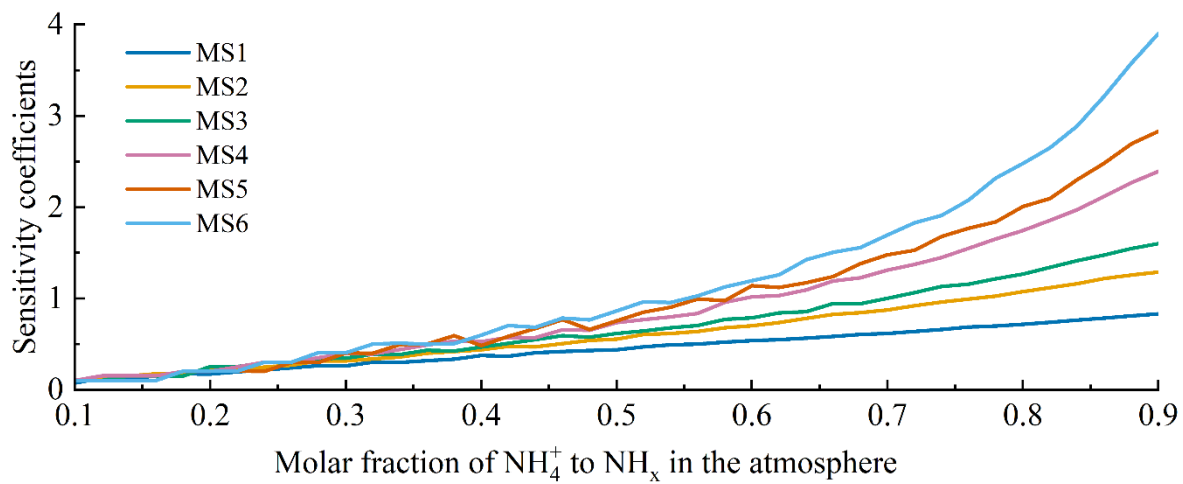

**Figure S1. Sensitivity coefficients of the molar fraction of  $\text{NH}_4^+$  to  $\text{NH}_x$  in the atmosphere to the  $\delta^{15}\text{N}_{4a-3s}$  values at 20°C obtained from six simulation scenarios.**

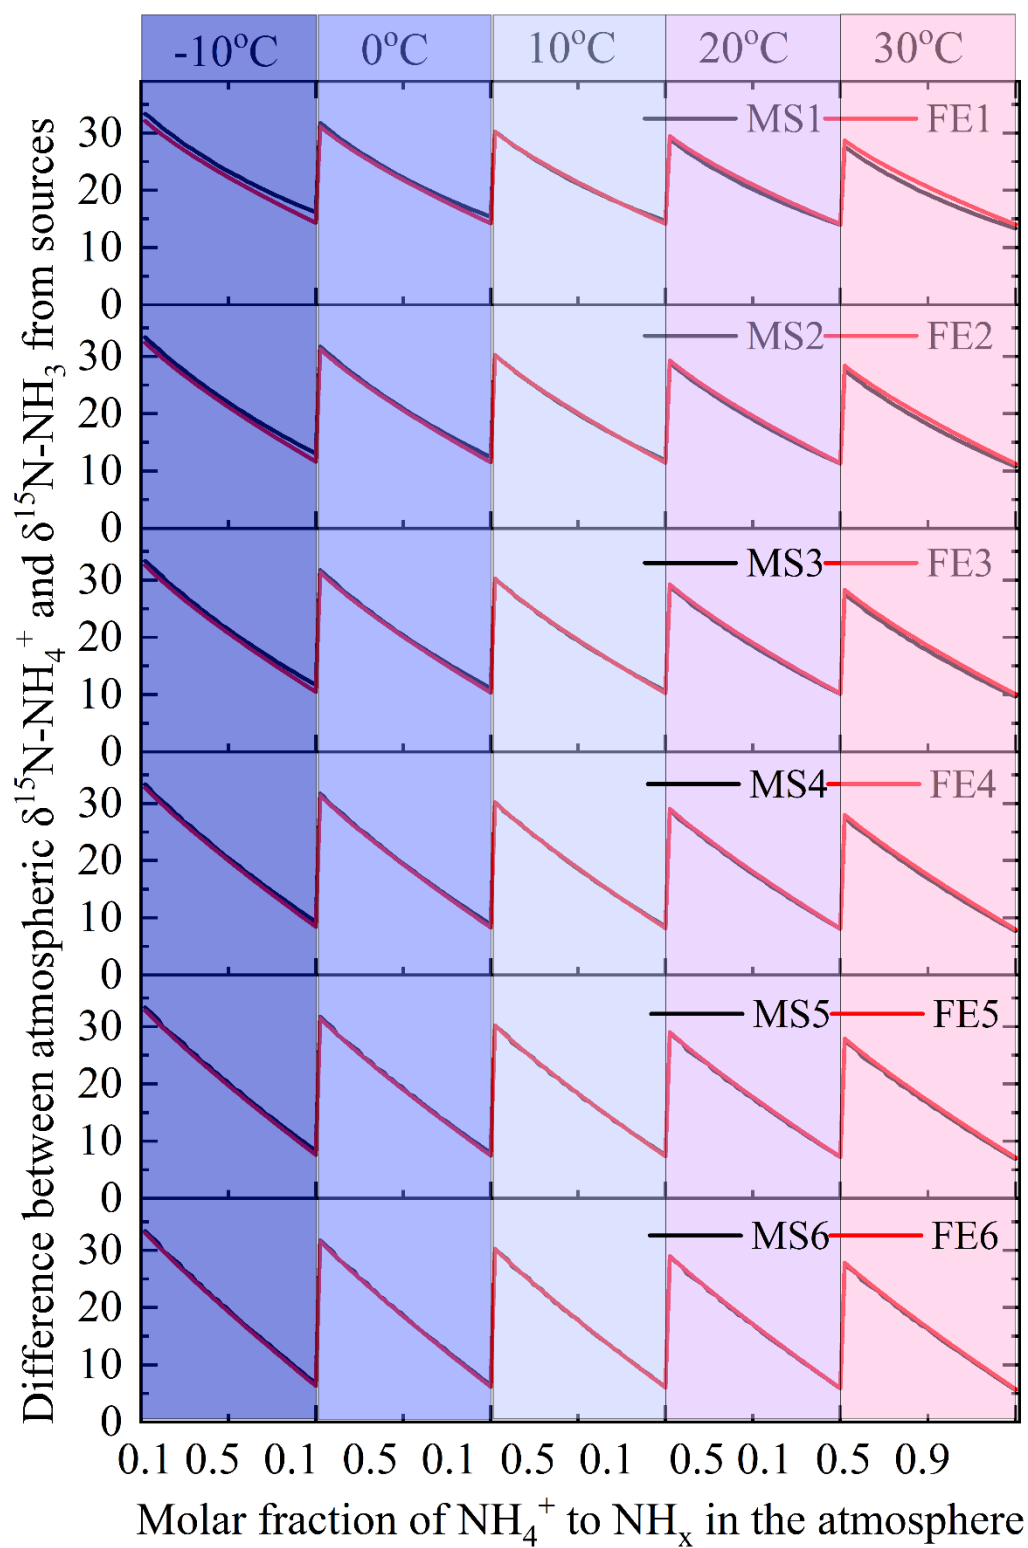

Figure S2. The comparison plots of the  $\delta^{15}\text{N}_{4a-3s}$  values calculated by the six fitted equations (FE) against the six model scenarios (MS) simulated by the developed model.

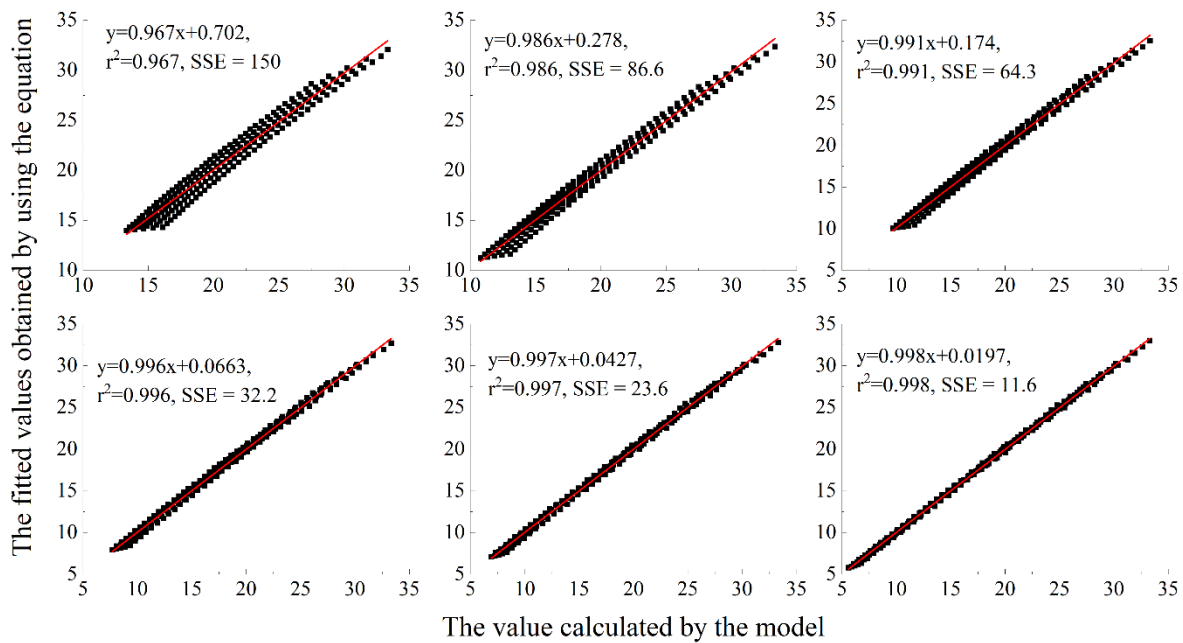

**Figure S3. Scatter plots of the  $\delta^{15}\text{N}_{4a-3s}$  values calculated by the six fitted equations (FE) against the six model scenarios (MS) simulated by the developed model.**

## References

- Baek, B. H., Aneja, V. P., and Tong, Q.: Chemical coupling between ammonia, acid gases, and fine particles, *Environmental Pollution*, 129, 89-98, <https://doi.org/10.1016/j.envpol.2003.09.022>, 2004.
- Behera, S. N. and Sharma, M.: Degradation of SO<sub>2</sub>, NO<sub>2</sub> and NH<sub>3</sub> leading to formation of secondary inorganic aerosols: An environmental chamber study, *Atmospheric Environment*, 45, 4015-4024, <https://doi.org/10.1016/j.atmosenv.2011.04.056>, 2011.
- Behera, S. N. and Sharma, M.: Transformation of atmospheric ammonia and acid gases into components of PM<sub>2.5</sub>: an environmental chamber study, *Environmental Science and Pollution Research*, 19, 1187-1197, <https://doi.org/10.1007/s11356-011-0635-9>, 2012.
- Bhattacharai, N., Wang, S., Xu, Q., Dong, Z., Chang, X., Jiang, Y., and Zheng, H.: Sources of gaseous NH<sub>3</sub> in urban Beijing from parallel sampling of NH<sub>3</sub> and NH<sub>4</sub><sup>+</sup>, their nitrogen isotope measurement and modeling, *Science of The Total Environment*, 747, 141361, <https://doi.org/10.1016/j.scitotenv.2020.141361>, 2020.
- Chang, Y., Liu, X., Deng, C., Dore, A. J., and Zhuang, G.: Source apportionment of atmospheric ammonia before, during, and after the 2014 APEC summit in Beijing using stable nitrogen isotope signatures, *Atmospheric Chemistry and Physics*, 16, 11635-11647, <https://doi.org/10.5194/acp-16-11635-2016>, 2016.
- Chang, Y., Cheng, K., Kuang, Y., Hu, Q., Gao, Y., Huang, R.-J., Huang, C., Walters, W. W., and Lehmann, M. F.: Isotopic Variability of Ammonia ( $\delta^{15}\text{N-NH}_3$ ) Slipped from Heavy-Duty Vehicles under Real-World Conditions, *Environmental Science & Technology Letters*, 9, 726-732, <https://doi.org/10.1021/acs.estlett.2c00526>, 2022.
- David Felix, J., Elliott, E. M., Gish, T. J., McConnell, L. L., and Shaw, S. L.: Characterizing the isotopic composition of atmospheric ammonia emission sources using passive samplers and a combined oxidation-bacterial denitrifier approach, *Rapid Communications in Mass Spectrometry*, 27, 2239-2246, <https://doi.org/10.1002/rcm.6679>, 2013.
- Erisman, J.-W., Vermetten, A. W. M., Asman, W. A. H., Waijers-Ijpelaan, A., and Slanina, J.: Vertical distribution of gases and aerosols: The behaviour of ammonia and related components in the lower atmosphere, *Atmospheric Environment (1967)*, 22, 1153-1160, [https://doi.org/10.1016/0004-6981\(88\)90345-9](https://doi.org/10.1016/0004-6981(88)90345-9), 1988.
- Frank, D. A., Evans, R. D., and Tracy, B. F.: The role of ammonia volatilization in controlling the natural <sup>15</sup>N abundance of a grazed grassland, *Biogeochemistry*, 68, 169-178, <https://doi.org/10.1023/B:BIOG.0000025736.19381.91>, 2004.

Freyer, H. D.: Seasonal trends of  $\text{NH}_4^+$  and  $\text{NO}_3^-$  nitrogen isotope composition in rain collected at Jülich, Germany, *Tellus*, 30, 83-92, <https://doi.org/10.1111/j.2153-3490.1978.tb00820.x>, 1978.

Harrison, R. M. and Kitto, A.-M. N.: Estimation of the rate constant for the reaction of acid sulphate aerosol with  $\text{NH}_3$  gas from atmospheric measurements, *Journal of Atmospheric Chemistry*, 15, 133-143, <https://doi.org/10.1007/bf00053755>, 1992.

Heaton, T. H. E.:  $^{15}\text{N}^{14}\text{N}$  ratios of nitrate and ammonium in rain at Pretoria, South Africa, *Atmospheric Environment* (1967), 21, 843-852, [https://doi.org/10.1016/0004-6981\(87\)90080-1](https://doi.org/10.1016/0004-6981(87)90080-1), 1987.

Hristov, A. N., Zaman, S., Vander Pol, M., Ndegwa, P., Campbell, L., and Silva, S.: Nitrogen losses from dairy manure estimated through nitrogen mass balance and chemical markers, *J Environ Qual*, 38, 2438-2448, <https://doi.org/10.2134/jeq2009.0057>, 2009.

Krupa, S. V.: Effects of atmospheric ammonia ( $\text{NH}_3$ ) on terrestrial vegetation: a review, *Environmental Pollution*, 124, 179-221, [https://doi.org/10.1016/S0269-7491\(02\)00434-7](https://doi.org/10.1016/S0269-7491(02)00434-7), 2003.

Lenhard, U. and Gravenhorst, G.: Evaluation of ammonia fluxes into the free atmosphere over Western Germany, *Tellus*, 32, 48-55, <https://doi.org/10.3402/tellusa.v32i1.10480>, 1980.

Qi, J. H., Shi, J. H., Gao, H. W., and Sun, Z.: Atmospheric dry and wet deposition of nitrogen species and its implication for primary productivity in coastal region of the Yellow Sea, China, *Atmospheric Environment*, 81, 600-608, <http://dx.doi.org/10.1016/j.atmosenv.2013.08.022>, 2013.

Renard, J. J., Calidonna, S. E., and Henley, M. V.: Fate of ammonia in the atmosphere—a review for applicability to hazardous releases, *Journal of Hazardous Materials*, 108, 29-60, <http://dx.doi.org/10.1016/j.jhazmat.2004.01.015>, 2004.

Savard, M. M., Cole, A., Smirnoff, A., and Vet, R.:  $\delta^{15}\text{N}$  values of atmospheric N species simultaneously collected using sector-based samplers distant from sources – Isotopic inheritance and fractionation, *Atmospheric Environment*, 162, 11-22, <https://doi.org/10.1016/j.atmosenv.2017.05.010>, 2017.

Schrader, F. and Brummer, C.: Land Use Specific Ammonia Deposition Velocities: a Review of Recent Studies (2004-2013), *Water Air and Soil Pollution*, 225, 2114-2125, <https://doi.org/10.1007/s11270-014-2114-7>, 2014.

Sharma, M., Kishore, S., Tripathi, S. N., and Behera, S. N.: Role of atmospheric ammonia in the formation of inorganic secondary particulate matter: A study at Kanpur, India, *Journal of Atmospheric Chemistry*, 58, 1-17, <https://doi.org/10.1007/s10874-007-9074-x>, 2007.

Shen, J. L., Tang, A. H., Liu, X. J., Fangmeier, A., Goulding, K. T. W., and Zhang, F. S.: High concentrations and dry deposition of reactive nitrogen species at two sites in the North China Plain, *Environmental Pollution*, 157, 3106-3113, <http://dx.doi.org/10.1016/j.envpol.2009.05.016>, 2009.

Shi, J.-H., Zhang, J., Gao, H.-W., Tan, S.-C., Yao, X.-H., and Ren, J.-L.: Concentration, solubility and deposition flux of atmospheric particulate nutrients over the Yellow Sea, *Deep Sea Research Part II: Topical Studies in Oceanography*, 97, 43-50, <https://doi.org/10.1016/j.dsr2.2013.05.004>, 2013.

Smirnoff, A., Savard, M. M., Vet, R., and Simard, M.-C.: Nitrogen and triple oxygen isotopes in near-road air samples using chemical conversion and thermal decomposition, *Rapid Communications in Mass Spectrometry*, 26, 2791-2804, <https://doi.org/10.1002/rcm.6406>, 2012.

Song, L.: Nitrogen emission isotopic signatures and sources apportionment of atmospheric nitrogen deposition-case of Shenyang, Institute of Applied Ecology, Chinese Academy of Sciences, University of Chinese Academy of Sciences, Shenyang, China, 2021.

Song, L., Walters, W. W., Pan, Y., Li, Z., Gu, M., Duan, Y., Lü, X., and Fang, Y.:  $^{15}\text{N}$  natural abundance of vehicular exhaust ammonia, quantified by active sampling techniques, *Atmospheric Environment*, 255, 118430, <https://doi.org/10.1016/j.atmosenv.2021.118430>, 2021.

Ti, C., Xia, L., Chang, S. X., and Yan, X.: Potential for mitigating global agricultural ammonia emission: A meta-analysis, *Environmental Pollution*, 245, 141-148, <https://doi.org/10.1016/j.envpol.2018.10.124>, 2019.

Ti, C., Gao, B., Luo, Y., Wang, X., Wang, S., and Yan, X.: Isotopic characterization of  $\text{NH}_x\text{-N}$  in deposition and major emission sources, *Biogeochemistry*, 138, 85-102, <https://doi.org/10.1007/s10533-018-0432-3>, 2018.

Vemetten, A. W. M., Asman, W. A. H., Buijsman, E., Slanina, J., and Waijers-Ijpelaan, A.: Concentrations of  $\text{NH}_3$  and  $\text{NH}_4^+$  over the Netherlands, <https://doi.org/10.13140/RG.2.1.3476.3608>, 1985.

Walters, W. W., Song, L., Chai, J., Fang, Y., Colombi, N., and Hastings, M. G.: Characterizing the spatiotemporal nitrogen stable isotopic composition of ammonia in vehicle plumes, *Atmos. Chem. Phys.*, 20, 11551-11567, <https://doi.org/10.5194/acp-20-11551-2020>, 2020.

Yang, R., Hayashi, K., Zhu, B., Li, F., and Yan, X.: Atmospheric  $\text{NH}_3$  and  $\text{NO}_2$  concentration and nitrogen deposition in an agricultural catchment of Eastern China, *Science of The Total Environment*, 408, 4624-4632, <http://dx.doi.org/10.1016/j.scitotenv.2010.06.006>, 2010.

Zhang, L., Brook, J., and Vet, R.: A revised parameterization for gaseous dry deposition in air-quality models, *Atmospheric Chemistry and Physics*, 3, <https://doi.org/10.5194/acpd-3-1777-2003>, 2003.

Zhang, Y., Dore, A. J., Liu, X., and Zhang, F.: Simulation of nitrogen deposition in the North China Plain by the FRAME model, *Biogeosci.*, 8, 3319-3329, <https://doi.org/10.5194/bg-8-3319-2011>, 2011.

Zhang, Y., Yu, Q., Ma, W., and Chen, L.: Atmospheric deposition of inorganic nitrogen to the eastern China seas and its implications to marine biogeochemistry, *Journal of Geophysical Research: Atmospheres*, 115, D00K10, <https://doi.org/10.1029/2009jd012814>, 2010.

Zhu, L., Chen, Y., Guo, L., and Wang, F.: Estimate of dry deposition fluxes of nutrients over the East China Sea: The implication of aerosol ammonium to non-sea-salt sulfate ratio to nutrient deposition of coastal oceans, *Atmospheric Environment*, 69, 131-138, <http://dx.doi.org/10.1016/j.atmosenv.2012.12.028>, 2013.
